# Supplementary material
Source: publisher figshare collection journal article supplement (https://frontiersin.figshare.com/ndownloader/files/28141506)
Supplement: Supplementary file [file 28141506]

**Current evidence of the efficacy and safety of neoadjuvant EGFR-TKIs for patients  
with non-small cell lung cancer (NSCLC)**

Xiaoshun Shi, Xiaoying Dong, Jianxue Zhai, Xiguang Liu, Di Lu, Zhen Ni, Hua Wu, Kaican  
Cai

Department of Thoracic Surgery, Nanfang Hospital, Southern Medical University,  
Guangzhou 510515, China

**Supplementary files**

## Table of Contents

| Items | Description                                                                                                                                                                                                                                                                                                                                                                                                                                                                                                                                                                                                                                                                                                                                                                                                                                                                    | Page |
|-------|--------------------------------------------------------------------------------------------------------------------------------------------------------------------------------------------------------------------------------------------------------------------------------------------------------------------------------------------------------------------------------------------------------------------------------------------------------------------------------------------------------------------------------------------------------------------------------------------------------------------------------------------------------------------------------------------------------------------------------------------------------------------------------------------------------------------------------------------------------------------------------|------|
| 1     | Literature search criteria                                                                                                                                                                                                                                                                                                                                                                                                                                                                                                                                                                                                                                                                                                                                                                                                                                                     | 3    |
| 2     | Figure S1 Proportional meta-analysis of pathological response rate                                                                                                                                                                                                                                                                                                                                                                                                                                                                                                                                                                                                                                                                                                                                                                                                             | 3    |
| 3     | Figure S2 Proportional meta-analysis of the ORR in overall population including wild type EGFR status                                                                                                                                                                                                                                                                                                                                                                                                                                                                                                                                                                                                                                                                                                                                                                          | 4    |
| 4     | Figure S3 Proportional meta-analysis of the rate of SD in population with EGFR-TKI-sensitive mutations                                                                                                                                                                                                                                                                                                                                                                                                                                                                                                                                                                                                                                                                                                                                                                         | 4    |
| 5     | Figure S4 Meta regression analysis of the rate of SD in population with EGFR-TKI-sensitive mutations based on including early stage NSCLC or not.                                                                                                                                                                                                                                                                                                                                                                                                                                                                                                                                                                                                                                                                                                                              | 4    |
| 6     | Figure S5 Proportional meta-analysis of the rate of rash in population with wild type EGFR population                                                                                                                                                                                                                                                                                                                                                                                                                                                                                                                                                                                                                                                                                                                                                                          | 5    |
| 7     | Figure S6 Meta regression analysis of the rate of rash in overall population based on patients with EGFR-TKIs sensitive mutation or not.                                                                                                                                                                                                                                                                                                                                                                                                                                                                                                                                                                                                                                                                                                                                       | 5    |
| 8     | Figure S7 Proportional meta-analysis of the diarrhea of rash in population with wild type EGFR population                                                                                                                                                                                                                                                                                                                                                                                                                                                                                                                                                                                                                                                                                                                                                                      | 6    |
| 9     | Figure S8 Meta regression analysis of the rate of diarrhea in overall population based on patients with EGFR-TKIs sensitive mutation or not.                                                                                                                                                                                                                                                                                                                                                                                                                                                                                                                                                                                                                                                                                                                                   | 6    |
| 10    | Figure S9 Meta regression analysis of the rate of rash in overall population based on including early stage NSCLC or not.                                                                                                                                                                                                                                                                                                                                                                                                                                                                                                                                                                                                                                                                                                                                                      | 7    |
| 11    | Figure S10 Meta regression analysis of the rate of diarrhea in overall population based on including early stage NSCLC or not.                                                                                                                                                                                                                                                                                                                                                                                                                                                                                                                                                                                                                                                                                                                                                 | 7    |
| 12    | Figure S11 Funnel plot of surgical rate in population with EGFR-TKI-sensitive mutations(a), the ORR in population with EGFR-TKI-sensitive mutations(b), the ORR in overall population including wild type EGFR status(c), rate of pathological response in population with EGFR-TKI-sensitive mutations(d), rate of stable disease in population with EGFR-TKI-sensitive mutations(e), rate of grade 1-2 AEs in population with EGFR-TKI-sensitive mutations(f), rate of grade 3-4 AEs in population with EGFR-TKI-sensitive mutations(g), rate of grade 1-2 rash in population with EGFR-TKI-sensitive mutations(h), rate of grade 1-2 rash in overall population including wild type EGFR status(i), rate of grade 1-2 diarrhea in overall population including wild type EGFR status(j), and rate of grade 1-2 diarrhea in population with EGFR-TKI-sensitive mutations(k). | 8-9  |

|    |                                                                                      |       |
|----|--------------------------------------------------------------------------------------|-------|
| 13 | Table S1 Meta-Analysis of Observational Studies in Epidemiology (MOOSE) standards    | 10-11 |
| 14 | Table S2 Quality assessment of included studies by using the Newcastle Ottawa Scale. | 12    |
| 15 | Table S3 The normality test of rates in proportional meta-analysis.                  | 13    |

## 1.Literature search criteria

((((((((((((non-small-cell lung cancer[title] OR non-small cell lung cancer[title]) OR non small-cell lung cancer[title]) OR non small cell lung cancer[title]) OR non-small-cell lung carcinoma[title]) OR non-small cell lung carcinoma[title]) OR non small-cell lung carcinoma[title]) OR non small cell lung carcinoma[title]) OR nsccl[title]) AND (epidermal growth factor receptor[title/abstract] OR EGFR[title/abstract])) AND (((((((((((((treatment[title/abstract] OR therapy[title/abstract]) OR tyrosine kinase inhibitor[title/abstract]) OR TKI[title/abstract]) OR osimertinib[title/abstract]) OR dacomitinib[title/abstract]) OR afatinib[title/abstract]) OR erlotinib[title/abstract]) OR gefitinib[title/abstract]) OR icotinib[title/abstract]) OR preoperative[title/abstract]) OR neoadjuvant[title/abstract]) OR surgery[title/abstract])) AND (English[Language])) AND ("0001/01/01"[Date - Publication] : "2020/05/11"[Date - Publication])

## Supplementary figures

**Figure S1** Proportional meta-analysis of pathological response rate

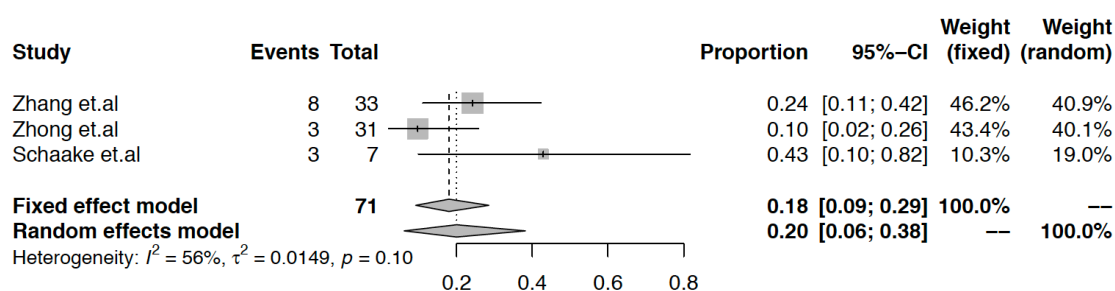

**Figure S2** Proportional meta-analysis of the ORR in overall population including wild type EGFR status

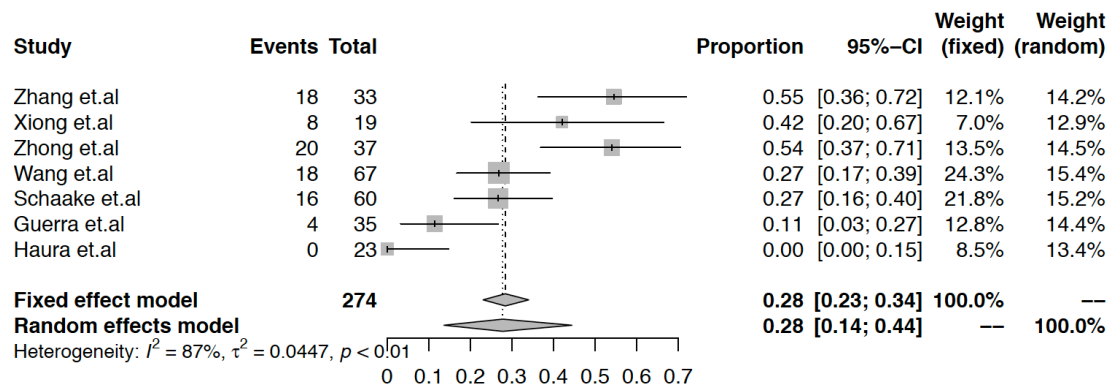

**Figure S3** Proportional meta-analysis of the rate of SD in population with EGFR-TKI-sensitive mutations

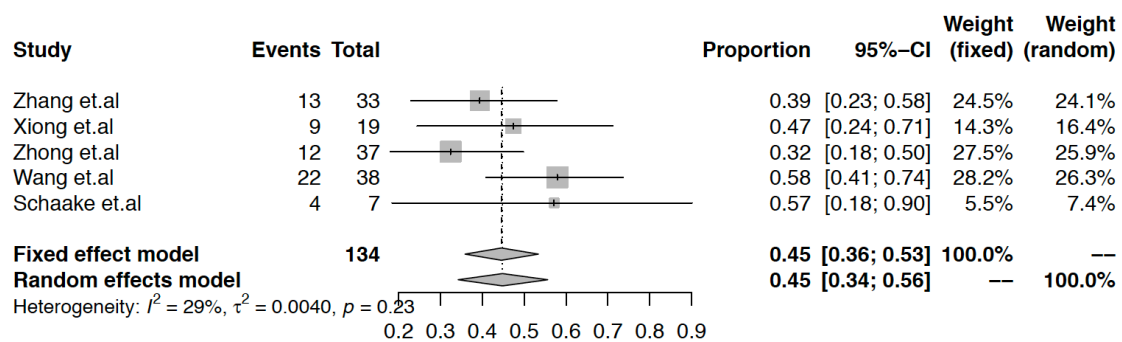

**Figure S4** Meta regression analysis of the rate of SD in population with EGFR-TKI-sensitive mutations based on researches including early stage NSCLC or not.

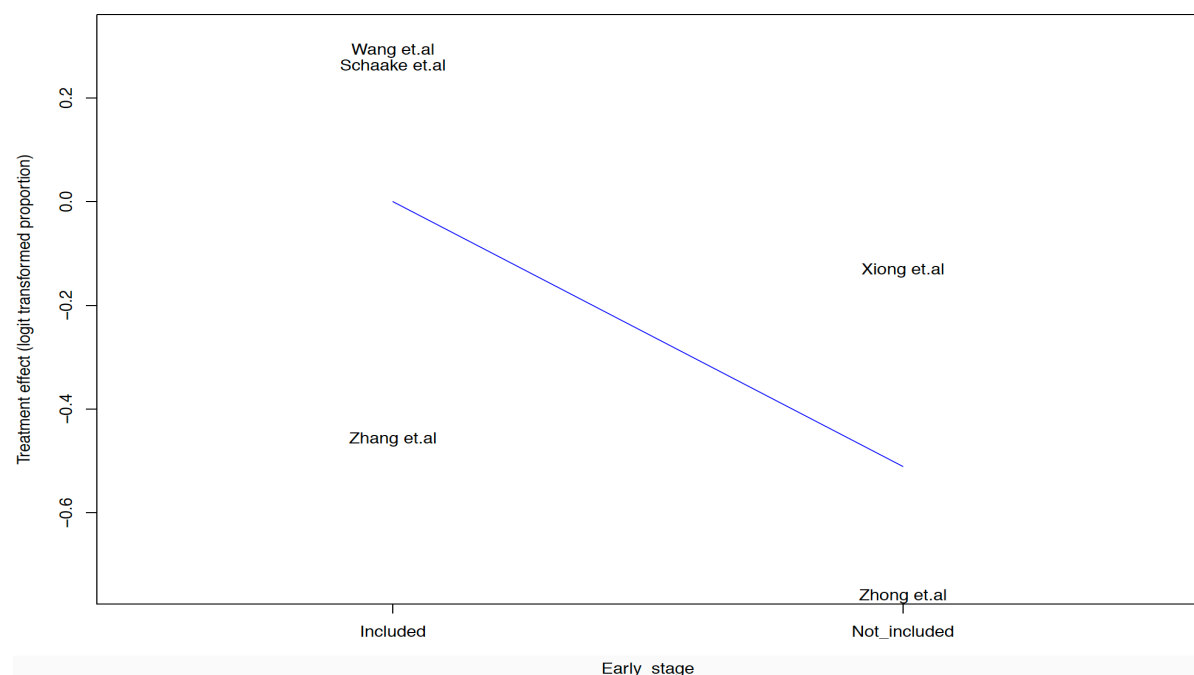

**Figure S5** Proportional meta-analysis of the rate of rash in population with wild type EGFR population

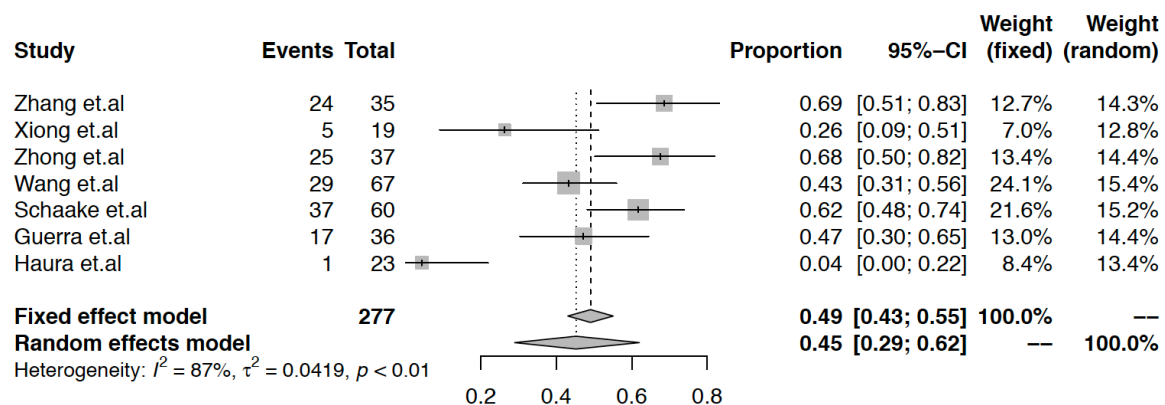

**Figure S6** Meta regression analysis of the rate of rash in overall population based on patients with EGFR-TKIs sensitive mutation or not.

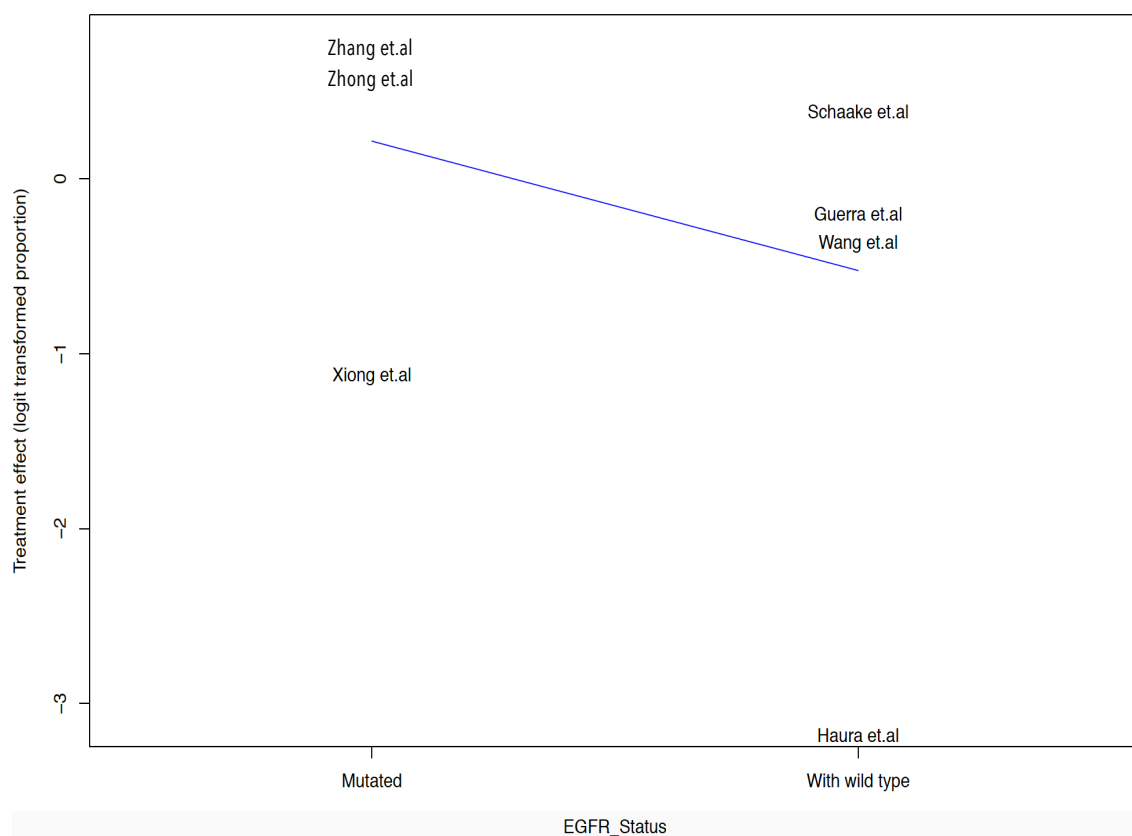

**Figure S7** Proportional meta-analysis of the diarrhea of rash in population with wild type EGFR population

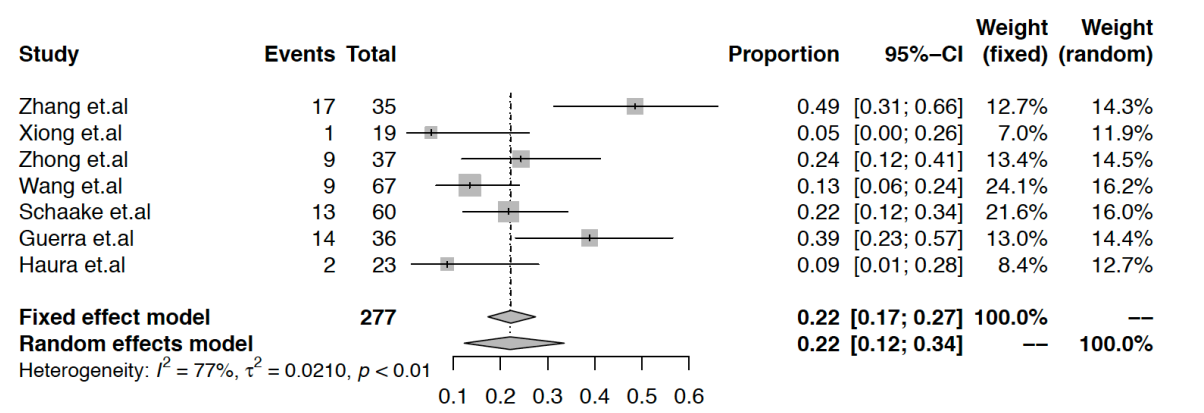

**Figure S8** Meta regression analysis of the rate of diarrhea in overall population based on patients with EGFR-TKIs sensitive mutation or not.

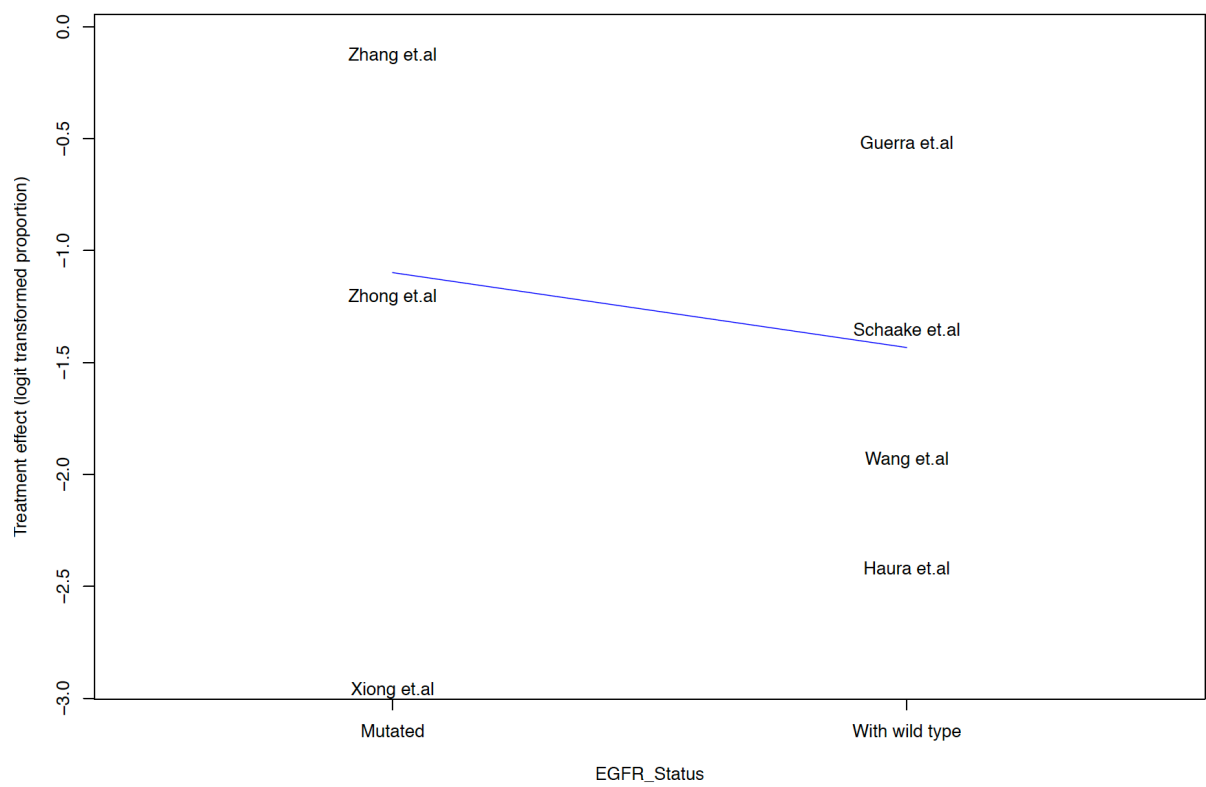

**Figure S9** Meta regression analysis of the rate of rash in overall population based on including early stage NSCLC or not.

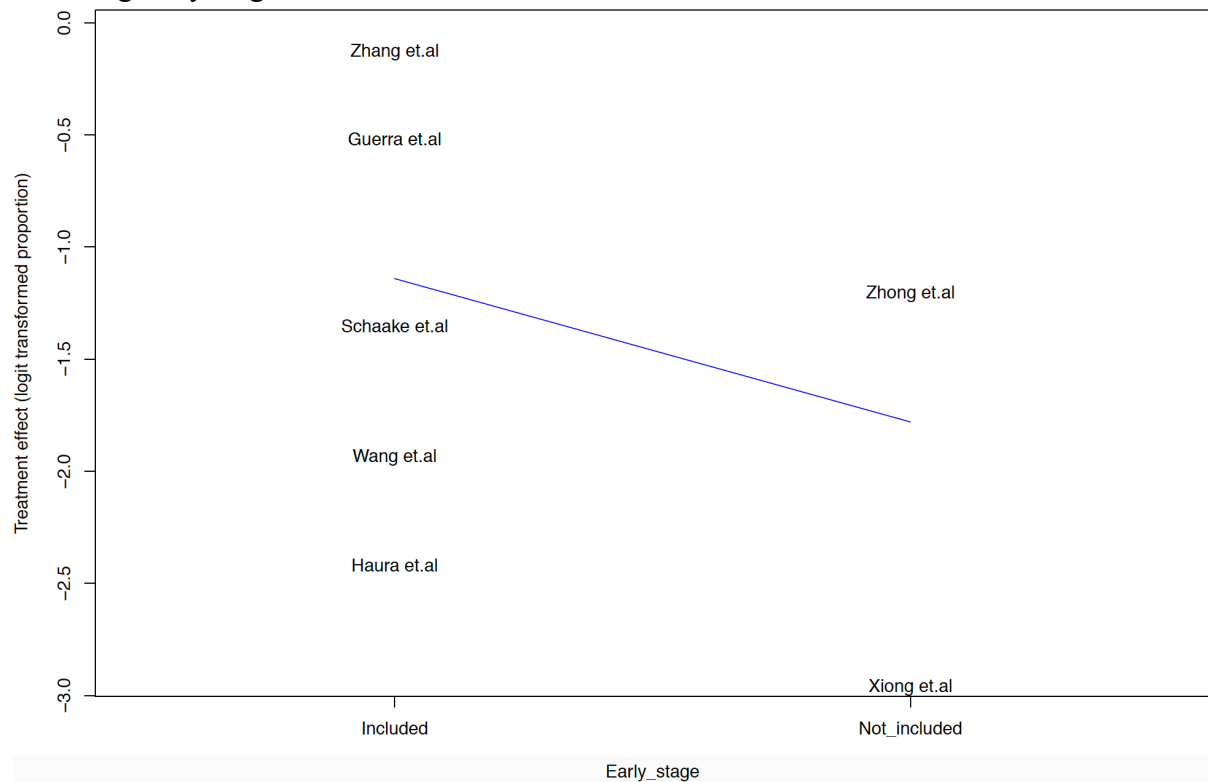

**Figure S10** Meta regression analysis of the rate of diarrhea in overall population based on including early stage NSCLC or not.

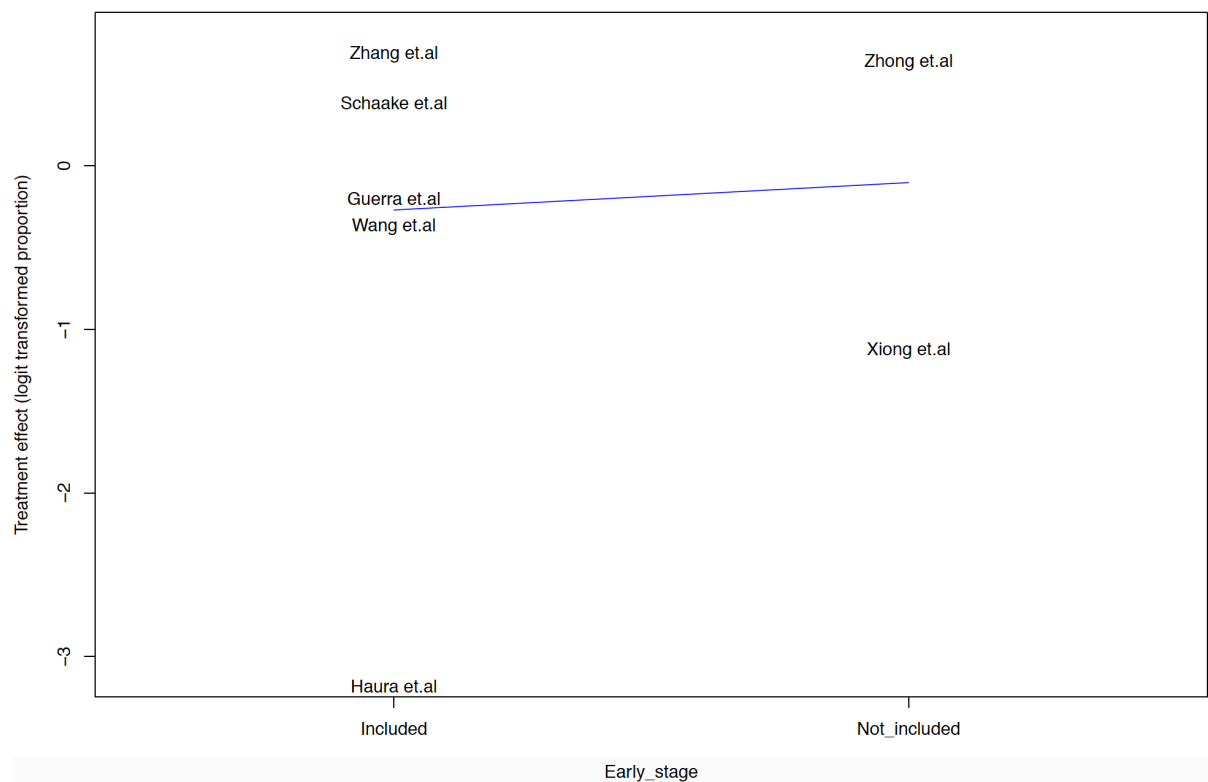

**Figure S11 Analysis of publication bias.** Funnel plot of surgical rate in population with EGFR-TKI-sensitive mutations(a, Egger's test:  $t = -1.2434$ ,  $df = 5$ ,  $p\text{-value} = 0.2689$ ), the ORR in population with EGFR-TKI-sensitive mutations(b, Egger's test:  $t = -1.4595$ ,  $df = 3$ ,  $p\text{-value} = 0.2405$ ), the ORR in overall population including wild type EGFR status(c, Egger's test:  $t = -0.17277$ ,  $df = 5$ ,  $p\text{-value} = 0.8696$ ), rate of pathological response in population with EGFR-TKI-sensitive mutations(d, Egger's test:  $t = 0.91115$ ,  $df = 1$ ,  $p\text{-value} = 0.5296$ ), rate of stable disease in population with EGFR-TKI-sensitive mutations(e, Egger's test:  $t = 0.47984$ ,  $df = 3$ ,  $p\text{-value} = 0.6642$ ), rate of grade 1-2 AEs in population with EGFR-TKI-sensitive mutations(f, Egger's test:  $t = -2.5808$ ,  $df = 1$ ,  $p\text{-value} = 0.2353$ ), rate of grade 3-4 AEs in population with EGFR-TKI-sensitive mutations(g, Egger's test:  $t = 1.0607$ ,  $df = 3$ ,  $p\text{-value} = 0.3667$ ), rate of grade 1-2 rash in population with EGFR-TKI-sensitive mutations(h, Egger's test:  $t = -9.2561$ ,  $df = 1$ ,  $p\text{-value} = 0.06851$ ), rate of grade 1-2 rash in overall population including wild type EGFR status(i, Egger's test:  $t = -1.2434$ ,  $df = 5$ ,  $p\text{-value} = 0.2689$ ), rate of grade 1-2 diarrhea in overall population including wild type EGFR status(j, Egger's test:  $t = -0.074812$ ,  $df = 5$ ,  $p\text{-value} = 0.9433$ ), and rate of grade 1-2 diarrhea in population with EGFR-TKI-sensitive mutations(k, Egger's test:  $t = -1.1618$ ,  $df = 1$ ,  $p\text{-value} = 0.4524$ ).

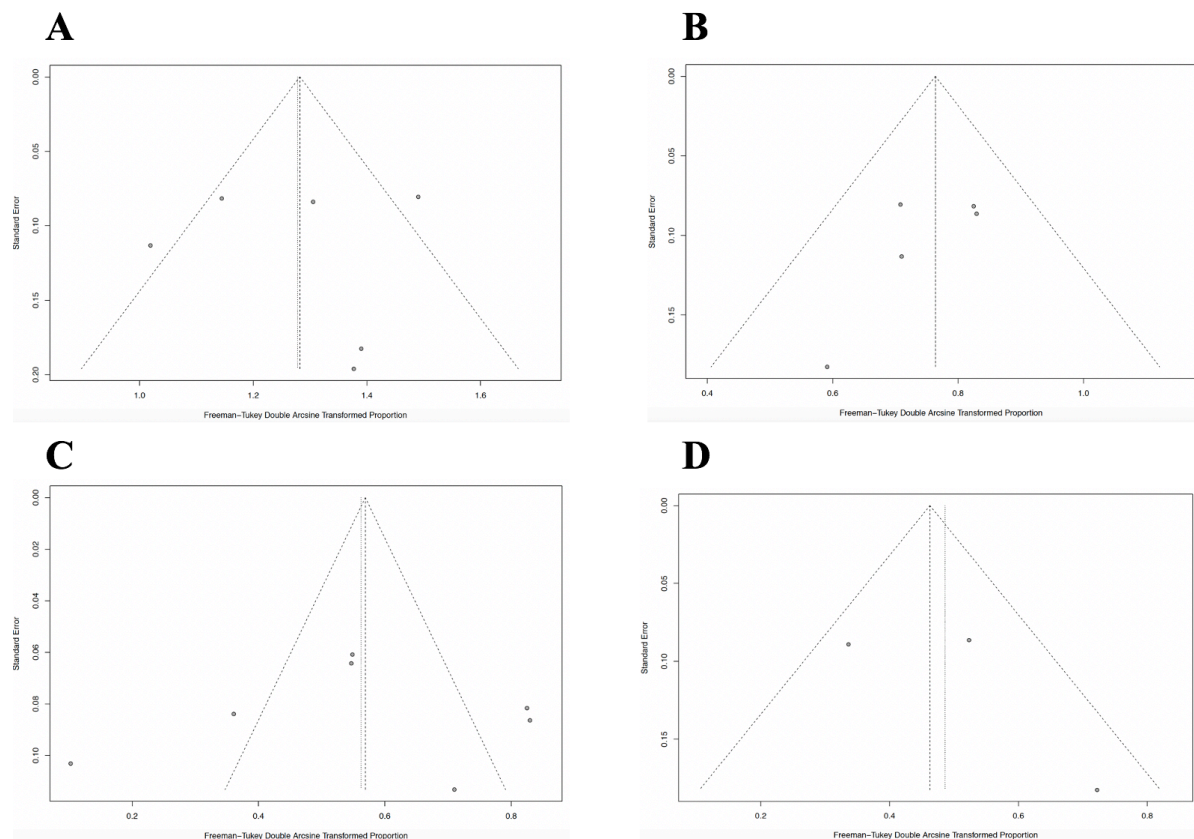



**E**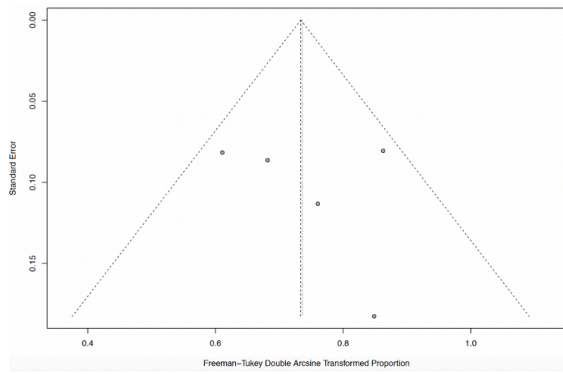**F**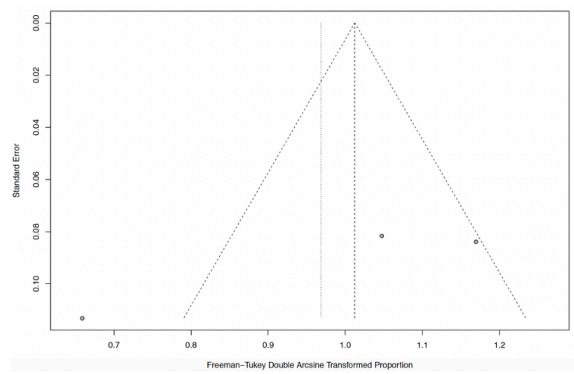**G**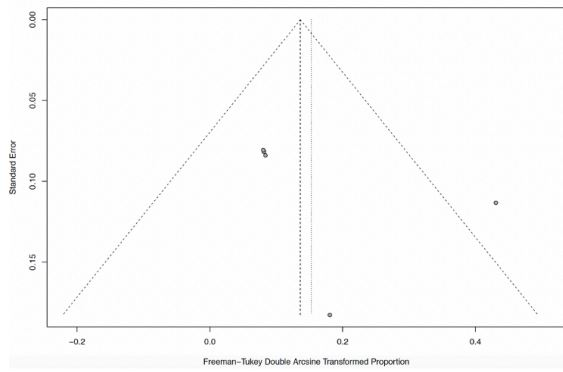**H**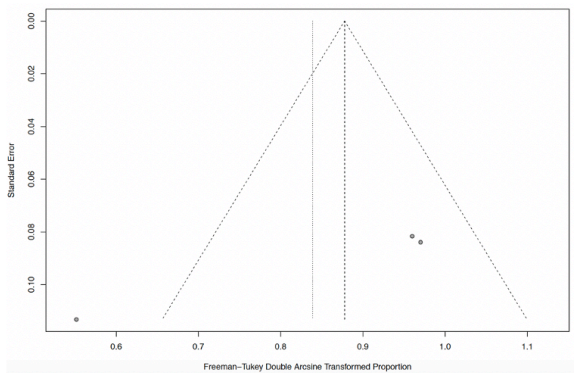**I**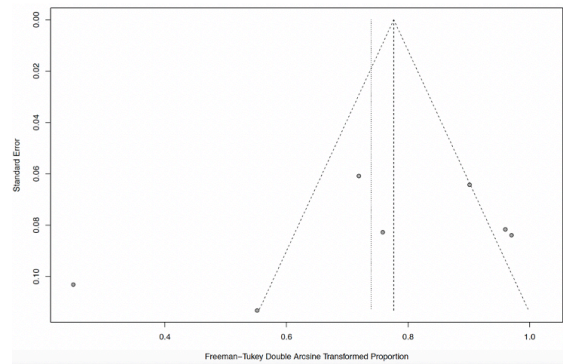**J**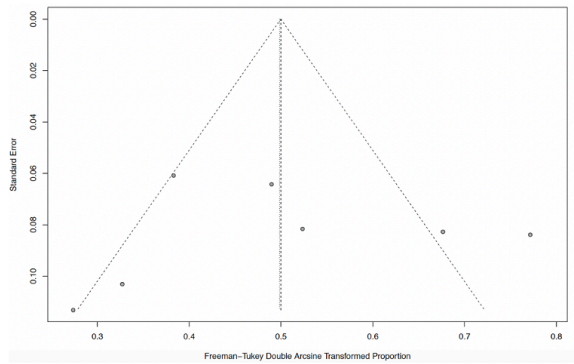**K**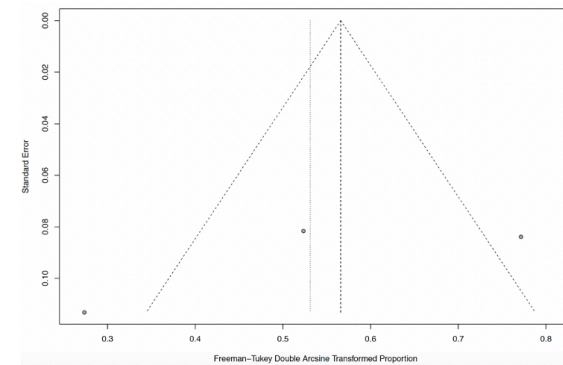

**Table S1. MOOSE (Meta-Analysis in Observational Studies in Epidemiology) Checklist**

| <b>REPORTING CRITERIA</b>                                                                                                                                                                                                                                                | <b>Reported</b> | <b>Page No.</b> |
|--------------------------------------------------------------------------------------------------------------------------------------------------------------------------------------------------------------------------------------------------------------------------|-----------------|-----------------|
| <b>Reporting of Background</b>                                                                                                                                                                                                                                           |                 |                 |
| Problem definition                                                                                                                                                                                                                                                       | Yes             | 2,3             |
| Hypothesis statement                                                                                                                                                                                                                                                     | Yes             | 3,4             |
| Description of study outcomes(s)                                                                                                                                                                                                                                         | Yes             | 2,3             |
| Type of exposure or intervention used                                                                                                                                                                                                                                    | Yes             | 2,3,4           |
| Type of study design used                                                                                                                                                                                                                                                | Yes             | 2,3,4           |
| Study population                                                                                                                                                                                                                                                         | Yes             | 2,3,4           |
| <b>Reporting of Search Strategy</b>                                                                                                                                                                                                                                      |                 |                 |
| Qualifications of searchers (librarians & investigators)                                                                                                                                                                                                                 | Yes             | 4,5             |
| Search strategy including time period included in synthesis and keywords                                                                                                                                                                                                 | Yes             | 4,5             |
| Effort to include all available studies including contact with authors                                                                                                                                                                                                   | Yes             | 4,5             |
| Database and registries searched                                                                                                                                                                                                                                         | Yes             | 4,5             |
| Search software used, name and version, including special features used                                                                                                                                                                                                  | Yes             | 5,6             |
| Use of hand searching (e.g. reference list of obtained articles)                                                                                                                                                                                                         | Yes             | NA              |
| List of citations located and those excluded, including justification                                                                                                                                                                                                    | Yes             | 5               |
| Method for addressing articles published in languages other than English                                                                                                                                                                                                 | Yes             | 5               |
| Method of handling abstracts and unpublished studies                                                                                                                                                                                                                     | Yes             | 5,6             |
| Description of any contact with authors                                                                                                                                                                                                                                  | Yes             | 5,6             |
| <b>Reporting of Methods</b>                                                                                                                                                                                                                                              |                 |                 |
| Description of relevance or appropriateness of studies assembled for assessing the hypothesis to be tested                                                                                                                                                               | Yes             | 4,5,6           |
| Rationale for the selection and coding of data (e.g. sound clinical principles or convenience)                                                                                                                                                                           | Yes             | 4,5,6           |
| Documentation of how data were classified and coded (e.g. multiple raters, blinding, and interrater reliability)                                                                                                                                                         | Yes             | 4,5,6           |
| Assessment of confounding (e.g. comparability of cases and controls in studies where appropriate)                                                                                                                                                                        | Yes             | 4,5,6           |
| <b>Reporting Criteria</b>                                                                                                                                                                                                                                                |                 |                 |
| Assessment of study quality, including blinding of quality assessors; stratification or regression of possible predictors of study results                                                                                                                               | Yes             | 4,5,6           |
| Assessment of heterogeneity                                                                                                                                                                                                                                              | Yes             | 4,5,6           |
| Description of statistical methods (e.g. complete description of fixed or random effects models, justification of whether chosen models account for predictors of study results, dose response models or cumulative meta-analysis) in sufficient detail to be replicated | Yes             | 4,5,6           |
| Provision of appropriate tables or graphs                                                                                                                                                                                                                                | Yes             | 11,12           |
| <b>Reporting of Results</b>                                                                                                                                                                                                                                              |                 |                 |
| Table giving descriptive information for each study included                                                                                                                                                                                                             | Yes             | 6               |
| Results of sensitivity testing (e.g. subgroup analysis)                                                                                                                                                                                                                  | Yes             | 6,7,8           |
| Indication of statistical uncertainty of findings                                                                                                                                                                                                                        | Yes             | 8               |
| <b>Reporting of Discussion</b>                                                                                                                                                                                                                                           |                 |                 |
| Quantitative assessment of bias                                                                                                                                                                                                                                          | Yes             | 8,9             |

|                                                                |     |     |
|----------------------------------------------------------------|-----|-----|
| Justification of exclusion                                     | Yes | 8,9 |
| Assessment of quality of included studies                      | Yes | 8,9 |
| <b>Reporting of Conclusions</b>                                |     |     |
| Consideration of alternative explanations for observed results | Yes | 8,9 |
| Generalisation of conclusions                                  | Yes | 10  |
| Guidelines for future research                                 | Yes | 10  |
| Disclosure of funding source                                   | Yes | 11  |

**Table S2** Quality assessment of included studies by using the Newcastle Ottawa Scale.

|                                                                                               | Selection                                   |                                           | Comparability<br>(**)               |                              | Outcome                                      |                                                    | Total (7*) | Quality<br>Score |      |
|-----------------------------------------------------------------------------------------------|---------------------------------------------|-------------------------------------------|-------------------------------------|------------------------------|----------------------------------------------|----------------------------------------------------|------------|------------------|------|
|                                                                                               | Representativeness of<br>exposed cohort (*) | Selection of<br>non-exposed<br>cohort (★) | Ascertainment<br>of exposure<br>(★) | Assessment of<br>outcome (*) | Adequacy<br>of length of<br>follow up<br>(*) | Adequacy of<br>completeness<br>of follow up<br>(*) |            |                  |      |
| <b>Zhang et al. 2020</b><br><i>The Journal of Thoracic<br/>and Cardiovascular<br/>Surgery</i> | *                                           | *                                         | *                                   | -                            | *                                            | *                                                  | *          | 6                | Good |
| <b>Xiong et al. 2018</b><br><i>The Oncologist</i>                                             | *                                           | *                                         | *                                   | *                            | *                                            | *                                                  | *          | 7                | Good |
| <b>Zhong et al. 2019</b><br><i>Journal of Clinical<br/>Oncology</i>                           | *                                           | *                                         | *                                   | *                            | *                                            | *                                                  | *          | 7                | Good |
| <b>Wang et al. 2016</b><br><i>OncoTargets and<br/>Therapy</i>                                 | *                                           | *                                         | *                                   | *                            | -                                            | -                                                  | -          | 4                | Poor |
| <b>Schaake et al. 2012</b><br><i>Journal of Clinical<br/>Oncology</i>                         | *                                           | *                                         | *                                   | *                            | -                                            | -                                                  | -          | 4                | Poor |
| <b>Lara-Guerra et al.<br/>2009</b><br><i>Journal of Clinical<br/>Oncology</i>                 | -                                           | *                                         | *                                   | *                            | *                                            | *                                                  | *          | 6                | Good |
| <b>Haura et al. 2010</b><br><i>Journal of Thoracic<br/>Oncology</i>                           | *                                           | -                                         | *                                   | -                            | *                                            | -                                                  | -          | 4                | Poor |

**Table S3 The normality test of rates in proportional meta-analysis.**

| Rates                                                         | Raw                                | Log transformation                | Logit transformation              | Arcsin transformation              | Double arcsin transformation       |
|---------------------------------------------------------------|------------------------------------|-----------------------------------|-----------------------------------|------------------------------------|------------------------------------|
| <b>Surgical rate</b>                                          | W = 0.80471,<br>p-value = 0.06476  | W = 0.79664,<br>p-value = 0.05481 | W = NaN,<br>p-value = NA          | W = 0.99089,<br>p-value = 0.9912   | W = 0.81867,<br>p-value = 0.08594  |
| <b>ORR in patients with EGFR-TKIs sensitive mutation</b>      | W = 0.88796,<br>p-value = 0.347    | W = 0.86749,<br>p-value = 0.2564  | W = 0.88411,<br>p-value = 0.3284  | W = 0.88412,<br>p-value = 0.3284   | W = 0.91982,<br>p-value = 0.5288   |
| <b>Pathological response</b>                                  | W = 0.99506,<br>p-value = 0.8656   | W = 0.98204,<br>p-value = 0.7433  | W = 0.99485,<br>p-value = 0.8629  | W = 0.99502,<br>p-value = 0.865    | W = 0.98953,<br>p-value = 0.8042   |
| <b>Grade 1-2 Adverse effects</b>                              | W = 0.89629,<br>p-value = 0.3738   | W = 0.85789,<br>p-value = 0.2618  | W = 0.9403,<br>p-value = 0.5286   | W = 0.91045,<br>p-value = 0.4196   | W = 0.92154,<br>p-value = 0.4578   |
| <b>Grade 3-4 Adverse effects</b>                              | W = 0.55218,<br>p-value = 0.000131 | W = NaN,<br>p-value = NA          | W = NaN,<br>p-value = NA          | W = 0.55218,<br>p-value = 0.000131 | W = 0.68361,<br>p-value = 0.006403 |
| <b>Stable disease</b>                                         | W = 0.91475,<br>p-value = 0.4966   | W = 0.91379,<br>p-value = 0.4907  | W = 0.91647,<br>p-value = 0.5074  | W = 0.98929,<br>p-value = 0.9771   | W = 0.98019,<br>p-value = 0.9356   |
| <b>ORR with wild type EGFR population</b>                     | W = 0.93057,<br>p-value = 0.5558   | W = NaN,<br>p-value = NA          | W = NaN,<br>p-value = NA          | W = 0.89884,<br>p-value = 0.324    | W = 0.90387,<br>p-value = 0.355    |
| <b>Diarrhea in patients with EGFR-TKIs sensitive mutation</b> | W = 0.99524,<br>p-value = 0.8682   | W = 0.95462,<br>p-value = 0.59    | W = 0.98129,<br>p-value = 0.738   | W = 0.99869,<br>p-value = 0.9308   | W = 0.99988,<br>p-value = 0.9788   |
| <b>Diarrhea in overall patients</b>                           | W = 0.93328,<br>p-value = 0.5792   | W = 0.96472,<br>p-value = 0.8581  | W = 0.97603,<br>p-value = 0.9382  | W = 0.96447,<br>p-value = 0.8561   | W = 0.95006,<br>p-value = 0.7302   |
| <b>Rash in patients with EGFR-TKIs sensitive mutation</b>     | W = 0.76781,<br>p-value = 0.03976  | W = 0.76155,<br>p-value = 0.02567 | W = 0.76913,<br>p-value = 0.04275 | W = 0.7661,<br>p-value = 0.03591   | W = 0.77344,<br>p-value = 0.05255  |
| <b>Rash in overall patients</b>                               | W = 0.90668,<br>p-value = 0.3734   | W = 0.7312,<br>p-value = 0.00804  | W = 0.83368,<br>p-value = 0.0867  | W = 0.87635,<br>p-value = 0.2107   | W = 0.89136,<br>p-value = 0.2818   |

- Red cells indicated the rates do not follow normal distribution. We used the Freeman-Tukey double arcsine transformation for it has the greatest number of normal distributed rates (10 out of 11) across the methods (green cells).
